# Supplementary material for: Porcine circovirus type 2 (PCV2) evolution before and after the vaccination introduction: A large scale epidemiological study
Source: PubMed Central journal article supplement (PMC5171922; doi:10.1038/srep39458), 2016-12-19

**Porcine circovirus type 2 (PCV2) evolution before and after the vaccination introduction. A large scale epidemiological study.**

Giovanni Franzo<sup>\*#1</sup>, Claudia Maria Tucciarone<sup>#1</sup>, Mattia Cecchinato<sup>1</sup> and Michele Drigo<sup>1</sup>.

<sup>1</sup>University of Padua, Legnaro (PD), Italy;

Supplementary figure 1. Density curves representing pairwise p-distance calculated for dataset 1-2 (a), 3-4 (b) and 5-6 (c).

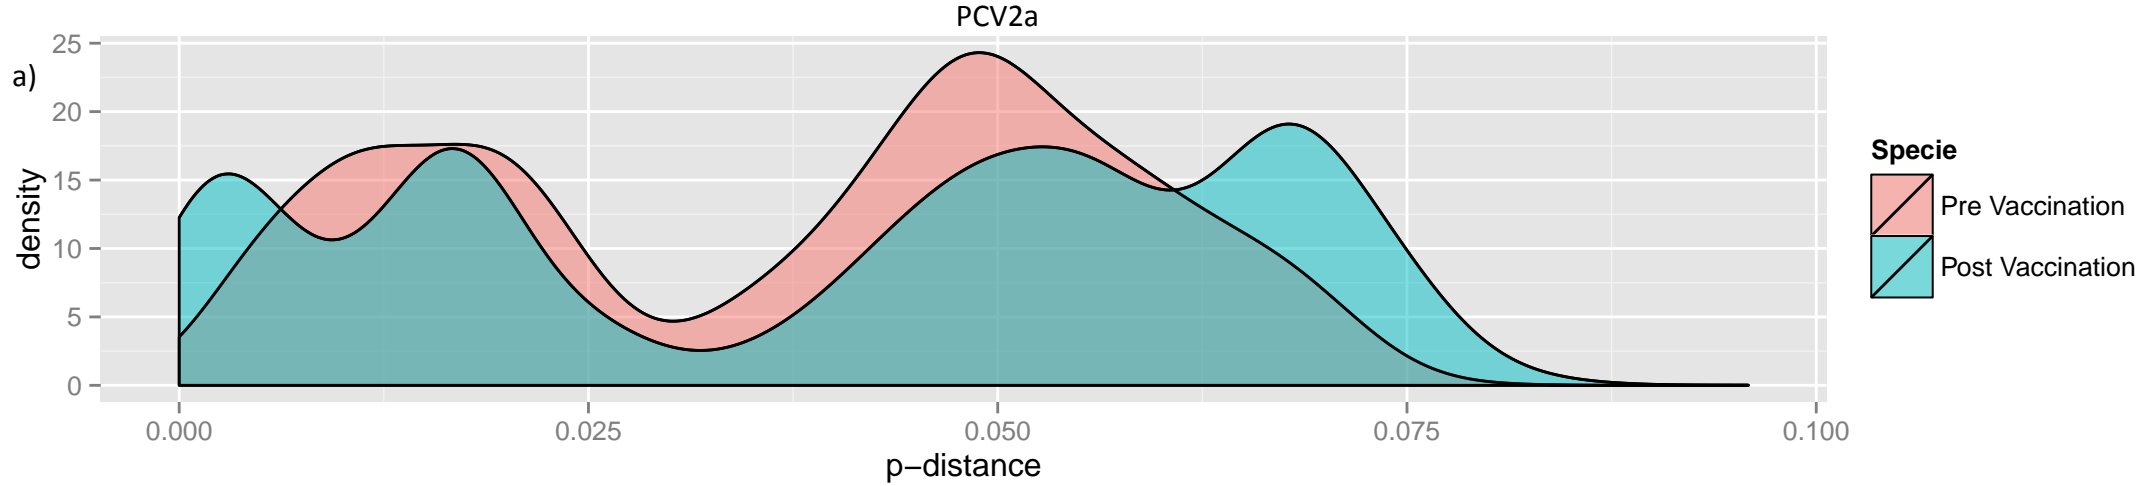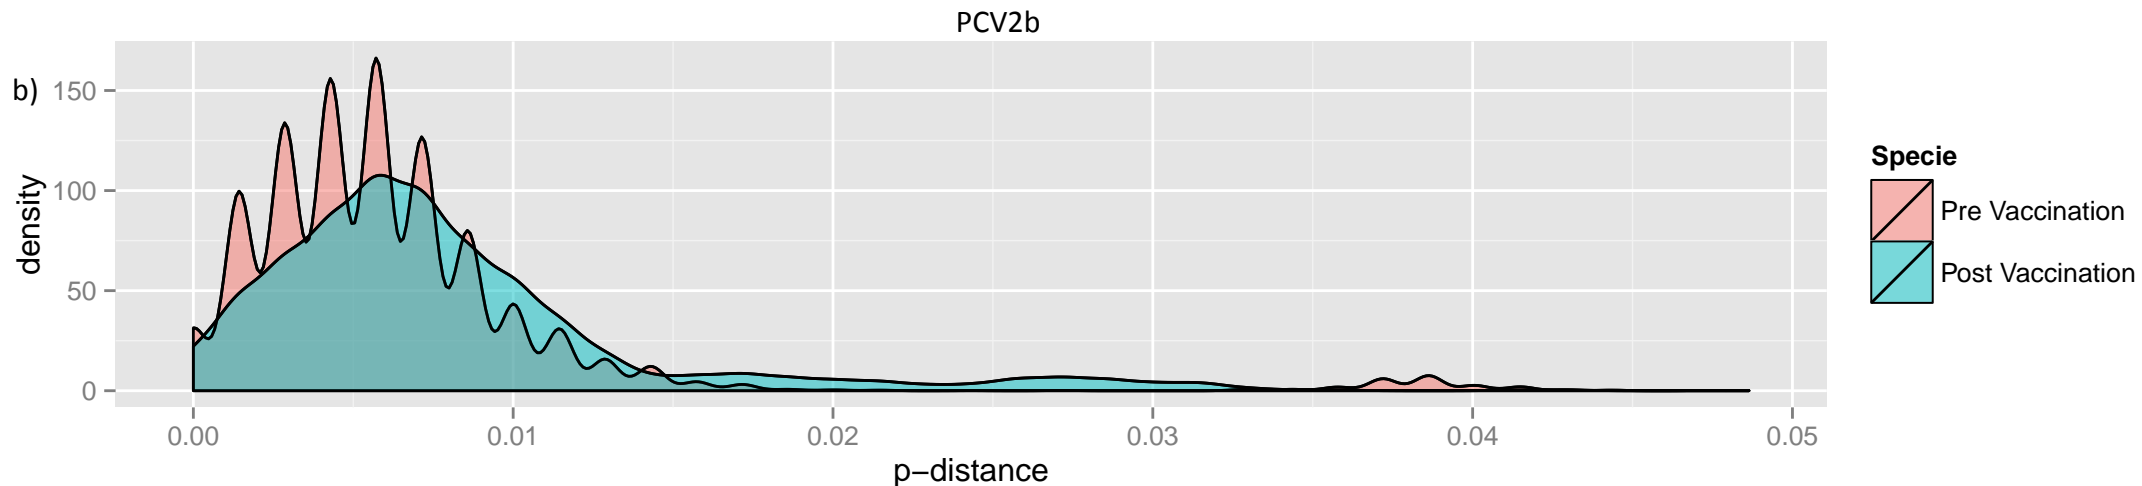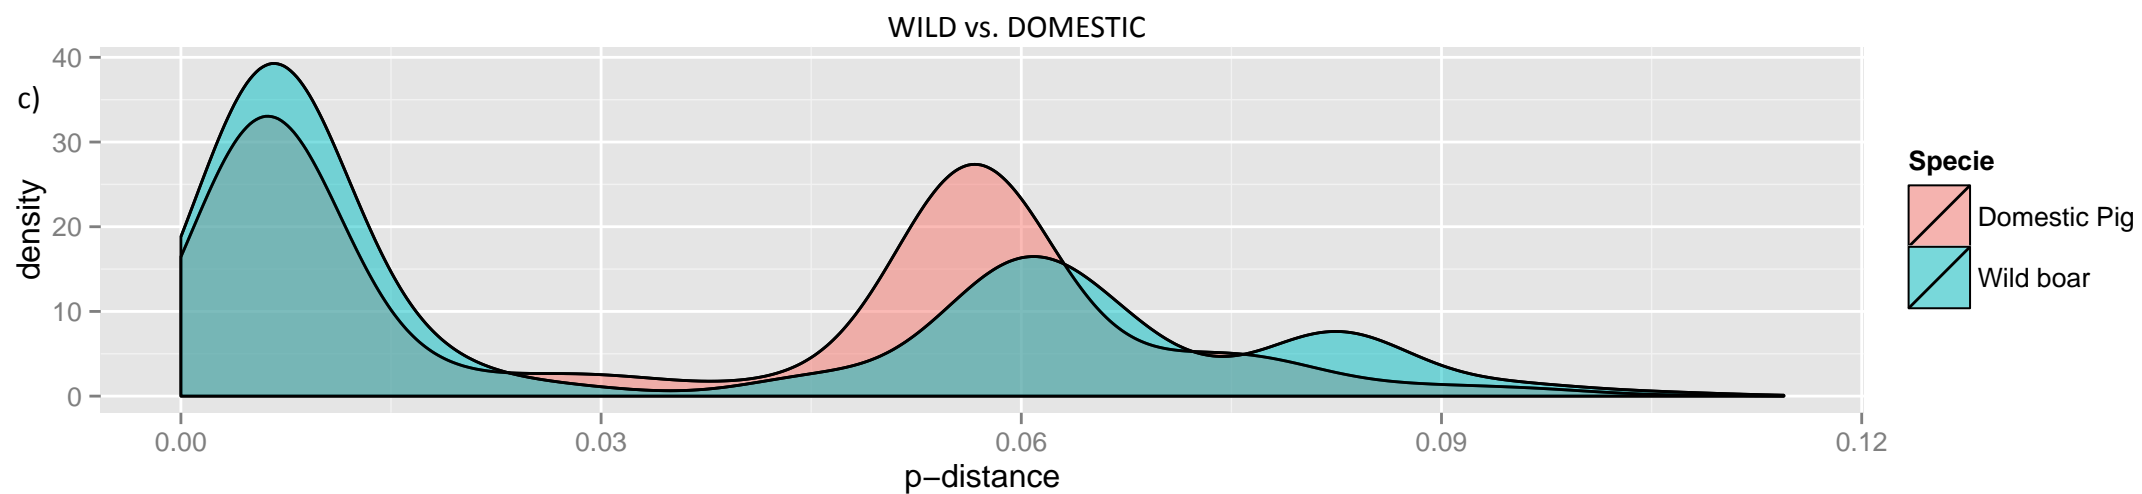

Supplement: srep39458-s1.pdf [file srep39458-s1.pdf]
