# Supplementary material for: Porcine circovirus type 2 (PCV2) evolution before and after the vaccination introduction: A large scale epidemiological study
Source: PubMed Central journal article supplement (PMC5171922; doi:10.1038/srep39458), 2016-12-19

**Porcine circovirus type 2 (PCV2) evolution before and after the vaccination introduction. A large scale epidemiological study.**

Giovanni Franzo<sup>\*#1</sup>, Claudia Maria Tucciarone<sup>#1</sup>, Mattia Cecchinato<sup>1</sup> and Michele Drigo<sup>1</sup>.

<sup>1</sup>University of Padua, Legnaro (PD), Italy;

Supplementary figure 2. Maximum likelihood phylogenetic tree reconstructed using a collection of PCV2 ORF2 sequences sampled from wild and domestic pigs. On the left, the whole PCV2 topology is depicted while on the right genotypes specific sub-trees are reported. PCV2 genotypes have been colour-coded in red (PCV2a), blue (PCV2b) and green (PCV2d) while the sequence names of strains collected from wild boars are highlighted in red.

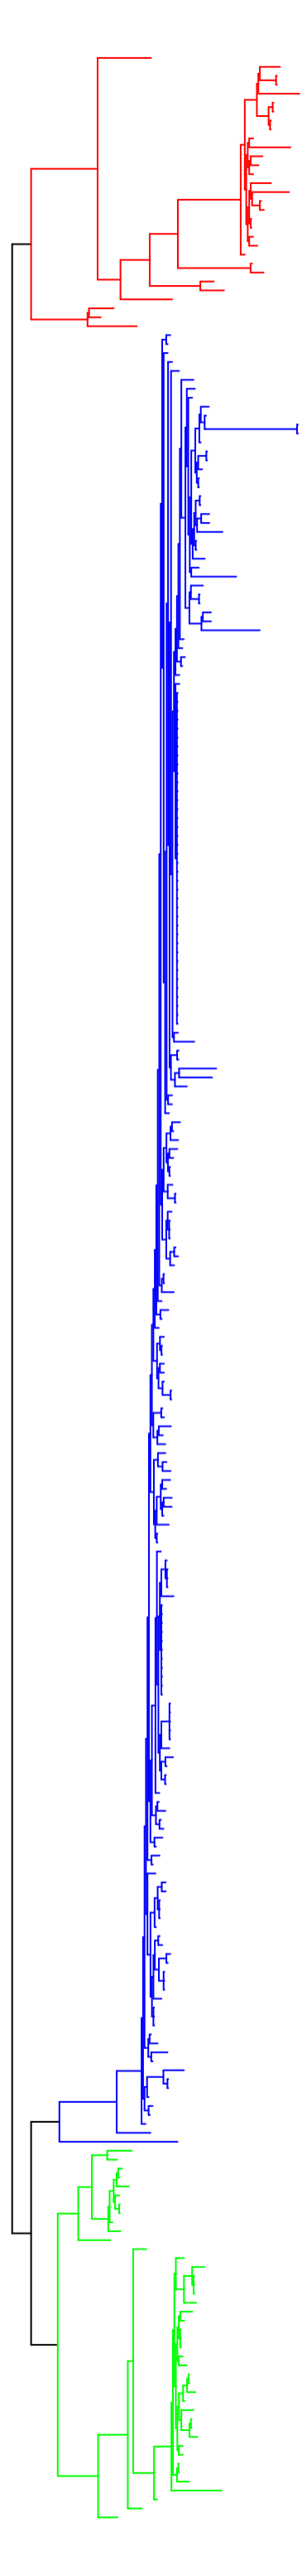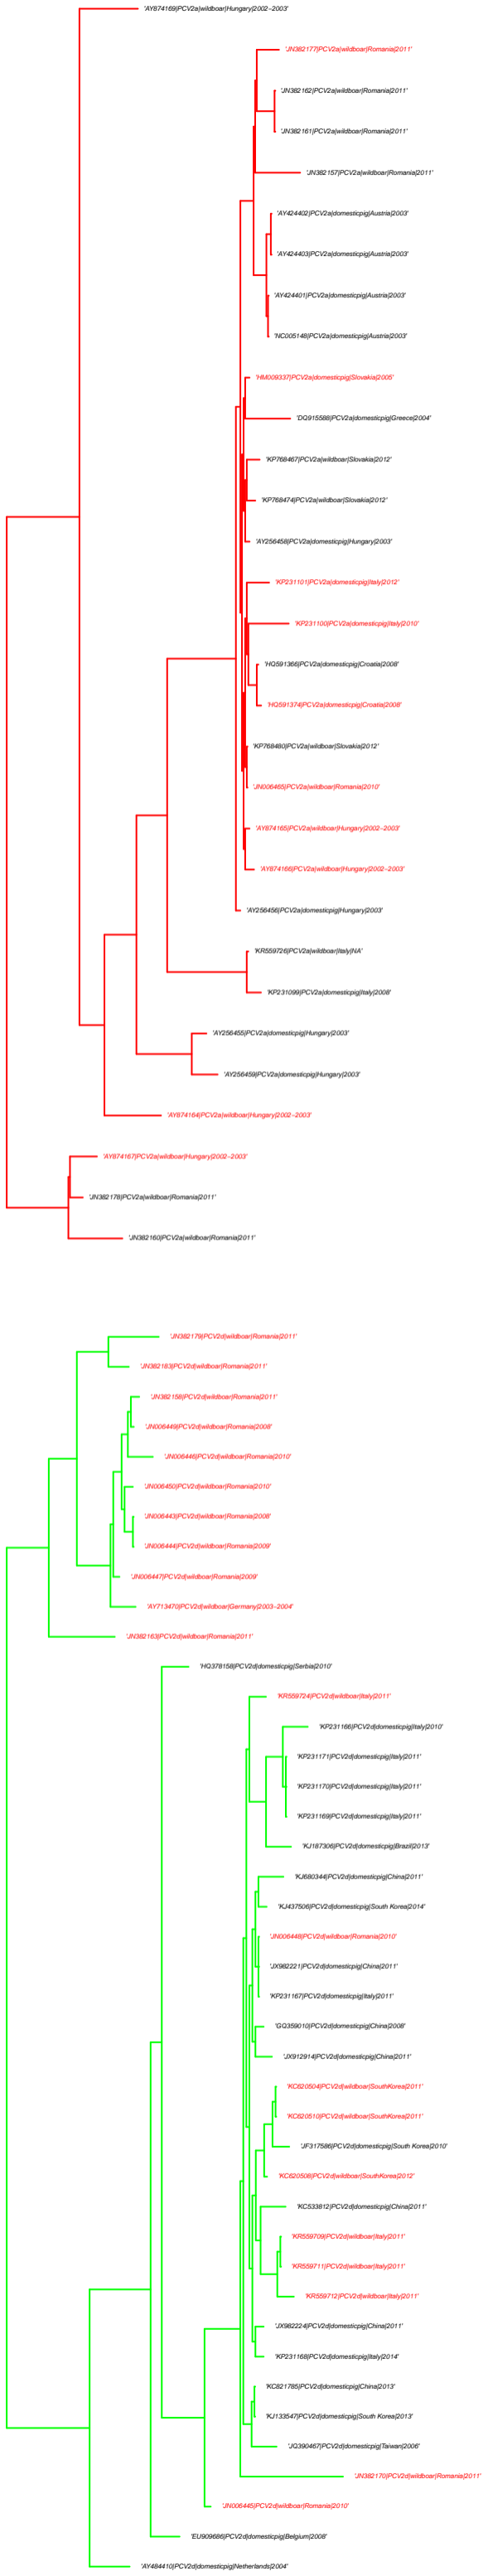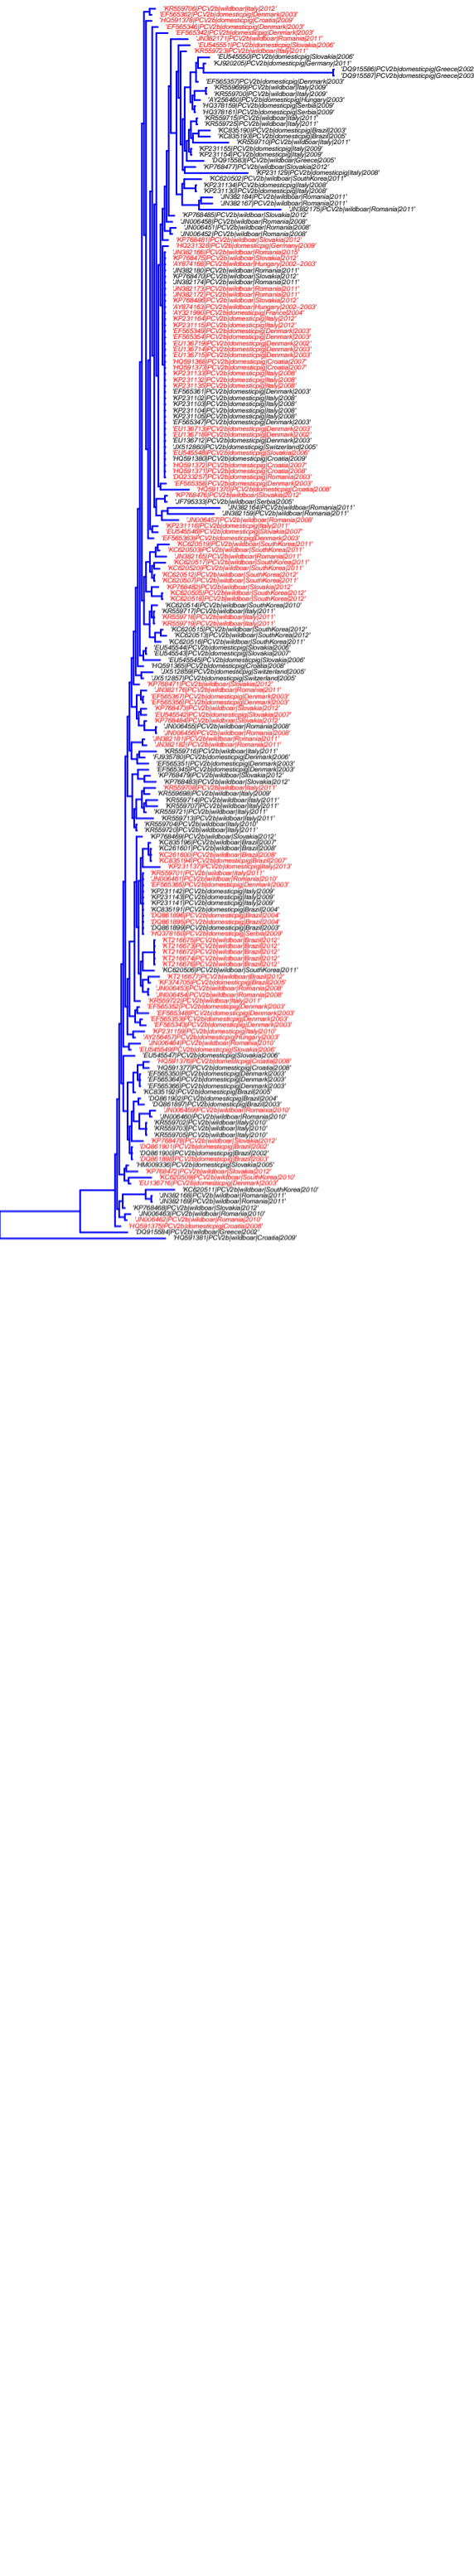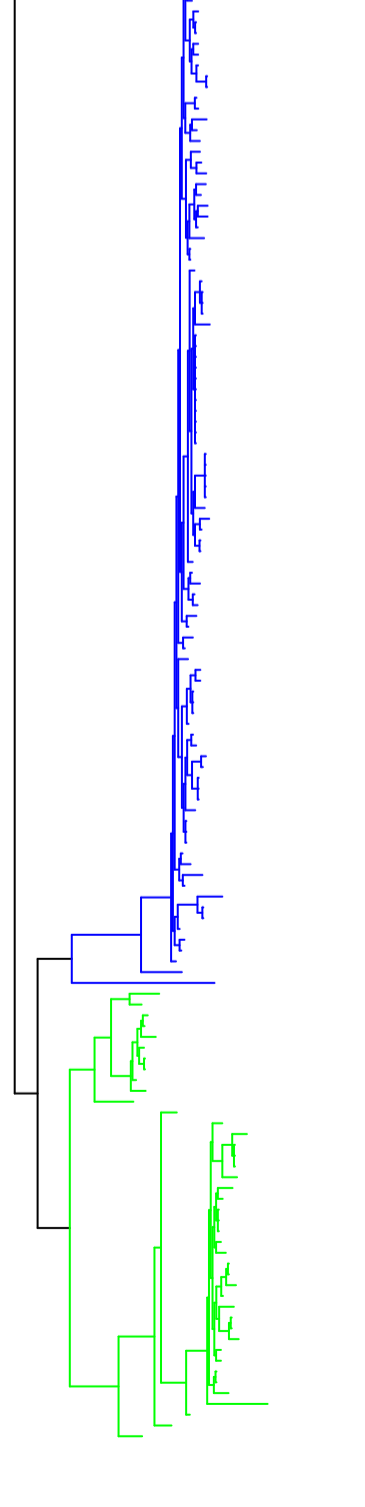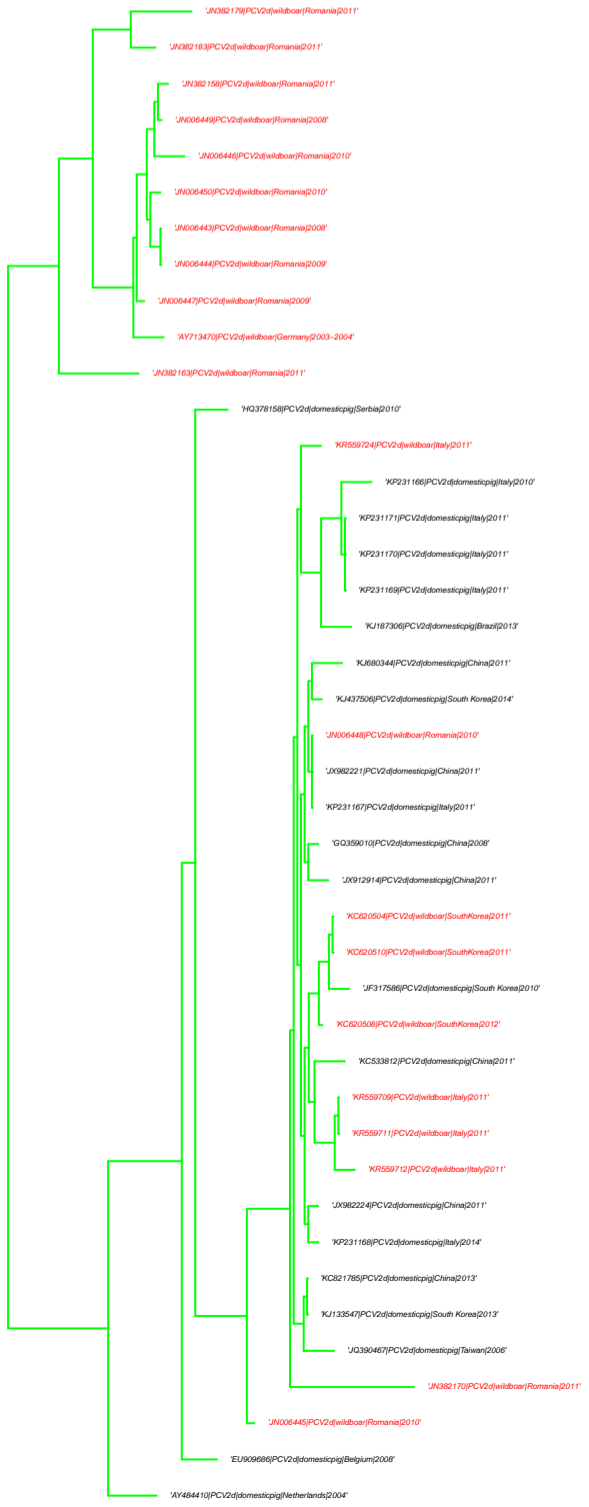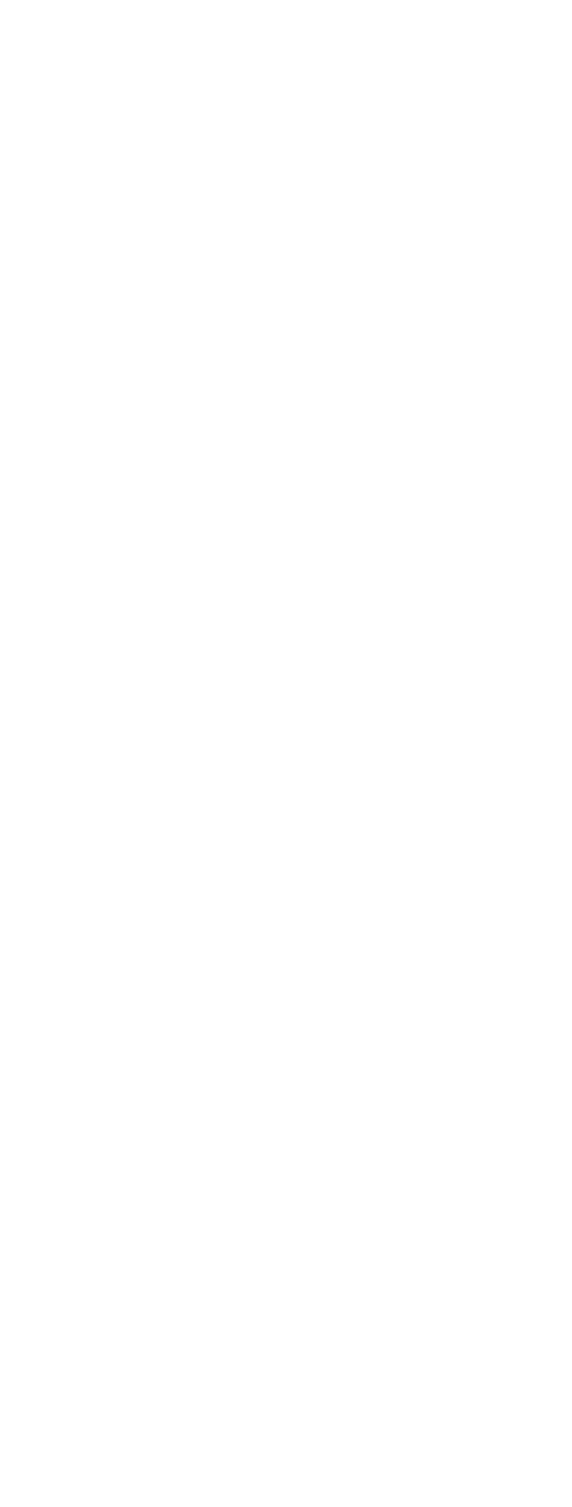

Supplement: srep39458-s2.pdf [file srep39458-s2.pdf]
