# Supplementary material for: Porcine circovirus type 2 (PCV2) evolution before and after the vaccination introduction: A large scale epidemiological study
Source: PubMed Central journal article supplement (PMC5171922; doi:10.1038/srep39458), 2016-12-19
Supplement: srep39458-s3.pdf [file srep39458-s3.pdf]

**Porcine circovirus type 2 (PCV2) evolution before and after the vaccination introduction. A large scale epidemiological study.**

Giovanni Franzo<sup>\*#1</sup>, Claudia Maria Tucciarone<sup>#1</sup>, Mattia Cecchinato<sup>1</sup> and Michele Drigo<sup>1</sup>.

<sup>1</sup>University of Padua, Legnaro (PD), Italy;

Supplementary table 1

| Acc.Number | Coutry      | Year | Genotype | Category        | Area          |
|------------|-------------|------|----------|-----------------|---------------|
| EU148506   | Denmark     | 1993 | Pcv2a    | Pre-Vaccination | Europe        |
| EU386606   | Sweden      | 1993 | Pcv2a    | Pre-Vaccination | Europe        |
| JX512853   | Switzerland | 1994 | Pcv2a    | Pre-Vaccination | Europe        |
| AY754016   | Australia   | 1999 | Pcv2a    | Pre-Vaccination | Oceania       |
| KC620521   | SouthKorea  | 1999 | Pcv2a    | Pre-Vaccination | Asia          |
| AF109399   | Canada      | 2000 | Pcv2a    | Pre-Vaccination | North America |
| AF117753   | Canada      | 2000 | Pcv2a    | Pre-Vaccination | North America |
| AF118095   | Canada      | 2000 | Pcv2a    | Pre-Vaccination | North America |
| AF118097   | Canada      | 2000 | Pcv2a    | Pre-Vaccination | North America |
| AF201305   | Germany     | 2000 | Pcv2a    | Pre-Vaccination | Europe        |
| AF201306   | Germany     | 2000 | Pcv2a    | Pre-Vaccination | Europe        |
| AF201307   | Germany     | 2000 | Pcv2a    | Pre-Vaccination | Europe        |
| AF201308   | Spain       | 2000 | Pcv2a    | Pre-Vaccination | Europe        |
| AF201309   | Spain       | 2000 | Pcv2a    | Pre-Vaccination | Europe        |
| AF201310   | Spain       | 2000 | Pcv2a    | Pre-Vaccination | Europe        |
| AF264038   | USA         | 2000 | Pcv2a    | Pre-Vaccination | North America |
| AF264039   | USA         | 2000 | Pcv2a    | Pre-Vaccination | North America |
| AF264040   | USA         | 2000 | Pcv2a    | Pre-Vaccination | North America |
| AF264041   | USA         | 2000 | Pcv2a    | Pre-Vaccination | North America |
| AF264042   | USA         | 2000 | Pcv2a    | Pre-Vaccination | North America |
| AF264043   | USA         | 2000 | Pcv2a    | Pre-Vaccination | North America |
| AY754017   | Australia   | 2000 | Pcv2a    | Pre-Vaccination | Oceania       |
| AY754018   | Australia   | 2000 | Pcv2a    | Pre-Vaccination | Oceania       |
| AY754019   | Australia   | 2000 | Pcv2a    | Pre-Vaccination | Oceania       |
| AY754020   | Australia   | 2000 | Pcv2a    | Pre-Vaccination | Oceania       |
| AY754021   | Australia   | 2000 | Pcv2a    | Pre-Vaccination | Oceania       |
| JX512854   | Switzerland | 2000 | Pcv2a    | Pre-Vaccination | Europe        |
| KC620522   | SouthKorea  | 2000 | Pcv2a    | Pre-Vaccination | Asia          |
| KC620523   | SouthKorea  | 2000 | Pcv2a    | Pre-Vaccination | Asia          |
| KC620524   | SouthKorea  | 2000 | Pcv2a    | Pre-Vaccination | Asia          |
| AB072301   | Japan       | 2001 | Pcv2a    | Pre-Vaccination | Asia          |
| AB072302   | Japan       | 2001 | Pcv2a    | Pre-Vaccination | Asia          |
| AB072303   | Japan       | 2001 | Pcv2a    | Pre-Vaccination | Asia          |
| AF364094   | Taiwan      | 2001 | Pcv2a    | Pre-Vaccination | Asia          |
| AF381175   | China       | 2001 | Pcv2a    | Pre-Vaccination | Asia          |
| AF381176   | China       | 2001 | Pcv2a    | Pre-Vaccination | Asia          |
| AF381177   | China       | 2001 | Pcv2a    | Pre-Vaccination | Asia          |
| AF408635   | Canada      | 2001 | Pcv2a    | Pre-Vaccination | North America |
| KC620525   | SouthKorea  | 2001 | Pcv2a    | Pre-Vaccination | Asia          |
| KC620526   | SouthKorea  | 2001 | Pcv2a    | Pre-Vaccination | Asia          |
| KC620527   | SouthKorea  | 2001 | Pcv2a    | Pre-Vaccination | Asia          |
| KC620528   | SouthKorea  | 2001 | Pcv2a    | Pre-Vaccination | Asia          |
| AF454546   | SouthKorea  | 2002 | Pcv2a    | Pre-Vaccination | Asia          |
| AF520783   | SouthKorea  | 2002 | Pcv2a    | Pre-Vaccination | Asia          |
| AF544024   | Korea       | 2002 | Pcv2a    | Pre-Vaccination | Asia          |
| AY146991   | Taiwan      | 2002 | Pcv2a    | Pre-Vaccination | Asia          |
| AY146993   | Taiwan      | 2002 | Pcv2a    | Pre-Vaccination | Asia          |
| AY754022   | Australia   | 2002 | Pcv2a    | Pre-Vaccination | Oceania       |
| AY874164   | Hungary     | 2002 | Pcv2a    | Pre-Vaccination | Europe        |
| AY874165   | Hungary     | 2002 | Pcv2a    | Pre-Vaccination | Europe        |
| AF465211   | Taiwan      | 2002 | Pcv2a    | Pre-Vaccination | Asia          |
| KC620529   | SouthKorea  | 2002 | Pcv2a    | Pre-Vaccination | Asia          |

Supplementary table 1

|          |             |      |       |                 |               |
|----------|-------------|------|-------|-----------------|---------------|
| KT868337 | USA         | 2002 | Pcv2a | Pre-Vaccination | North America |
| AY094619 | USA         | 2003 | Pcv2a | Pre-Vaccination | North America |
| AY180396 | Taiwan      | 2003 | Pcv2a | Pre-Vaccination | Asia          |
| AY180397 | Taiwan      | 2003 | Pcv2a | Pre-Vaccination | Asia          |
| AY181948 | China       | 2003 | Pcv2a | Pre-Vaccination | Asia          |
| AY256455 | Hungary     | 2003 | Pcv2a | Pre-Vaccination | Europe        |
| AY256456 | Hungary     | 2003 | Pcv2a | Pre-Vaccination | Europe        |
| AY256458 | Hungary     | 2003 | Pcv2a | Pre-Vaccination | Europe        |
| AY256459 | Hungary     | 2003 | Pcv2a | Pre-Vaccination | Europe        |
| AY288135 | China       | 2003 | Pcv2a | Pre-Vaccination | Asia          |
| AY325495 | SouthAfrica | 2003 | Pcv2a | Pre-Vaccination | Africa        |
| AY424401 | Austria     | 2003 | Pcv2a | Pre-Vaccination | Europe        |
| AY424402 | Austria     | 2003 | Pcv2a | Pre-Vaccination | Europe        |
| AY424403 | Austria     | 2003 | Pcv2a | Pre-Vaccination | Europe        |
| AY874166 | Hungary     | 2003 | Pcv2a | Pre-Vaccination | Europe        |
| AY874169 | Hungary     | 2003 | Pcv2a | Pre-Vaccination | Europe        |
| DQ397521 | USA         | 2003 | Pcv2a | Pre-Vaccination | North America |
| EU136711 | Denmark     | 2003 | Pcv2a | Pre-Vaccination | Europe        |
| KC620530 | SouthKorea  | 2003 | Pcv2a | Pre-Vaccination | Asia          |
| KT868318 | USA         | 2003 | Pcv2a | Pre-Vaccination | North America |
| KT868430 | USA         | 2003 | Pcv2a | Pre-Vaccination | North America |
| NC005148 | Austria     | 2003 | Pcv2a | Pre-Vaccination | Europe        |
| AY322004 | France      | 2004 | Pcv2a | Pre-Vaccination | Europe        |
| AY556474 | China       | 2004 | Pcv2a | Pre-Vaccination | Asia          |
| AY699793 | USA         | 2004 | Pcv2a | Pre-Vaccination | North America |
| DQ915588 | Greece      | 2004 | Pcv2a | Pre-Vaccination | Europe        |
| KC620531 | SouthKorea  | 2004 | Pcv2a | Pre-Vaccination | Asia          |
| KC620532 | SouthKorea  | 2004 | Pcv2a | Pre-Vaccination | Asia          |
| KT868051 | USA         | 2004 | Pcv2a | Pre-Vaccination | North America |
| KT868310 | USA         | 2004 | Pcv2a | Pre-Vaccination | North America |
| KT868311 | USA         | 2004 | Pcv2a | Pre-Vaccination | North America |
| KT868314 | USA         | 2004 | Pcv2a | Pre-Vaccination | North America |
| DQ104421 | China       | 2005 | Pcv2a | Pre-Vaccination | Asia          |
| DQ104423 | China       | 2005 | Pcv2a | Pre-Vaccination | Asia          |
| DQ629113 | USA         | 2005 | Pcv2a | Pre-Vaccination | North America |
| DQ629114 | USA         | 2005 | Pcv2a | Pre-Vaccination | North America |
| DQ870484 | USA         | 2005 | Pcv2a | Pre-Vaccination | North America |
| EF394774 | Canada      | 2005 | Pcv2a | Pre-Vaccination | North America |
| EF394775 | Canada      | 2005 | Pcv2a | Pre-Vaccination | North America |
| EF394776 | Canada      | 2005 | Pcv2a | Pre-Vaccination | North America |
| FJ483938 | China       | 2005 | Pcv2a | Pre-Vaccination | Asia          |
| HM009337 | Slovakia    | 2005 | Pcv2a | Pre-Vaccination | Europe        |
| KT868027 | USA         | 2005 | Pcv2a | Pre-Vaccination | North America |
| KT868033 | USA         | 2005 | Pcv2a | Pre-Vaccination | North America |
| KT868044 | USA         | 2005 | Pcv2a | Pre-Vaccination | North America |
| KT868058 | USA         | 2005 | Pcv2a | Pre-Vaccination | North America |
| KT868060 | USA         | 2005 | Pcv2a | Pre-Vaccination | North America |
| KT868064 | USA         | 2005 | Pcv2a | Pre-Vaccination | North America |
| KT868070 | USA         | 2005 | Pcv2a | Pre-Vaccination | North America |
| KT868315 | USA         | 2005 | Pcv2a | Pre-Vaccination | North America |
| KT868332 | USA         | 2005 | Pcv2a | Pre-Vaccination | North America |
| KT868333 | USA         | 2005 | Pcv2a | Pre-Vaccination | North America |
| KT868334 | USA         | 2005 | Pcv2a | Pre-Vaccination | North America |

Supplementary table 1

|          |            |      |       |                  |               |
|----------|------------|------|-------|------------------|---------------|
| KT868335 | USA        | 2005 | Pcv2a | Pre-Vaccination  | North America |
| KT868362 | USA        | 2005 | Pcv2a | Pre-Vaccination  | North America |
| KT868366 | USA        | 2005 | Pcv2a | Pre-Vaccination  | North America |
| KT868370 | USA        | 2005 | Pcv2a | Pre-Vaccination  | North America |
| KT868374 | USA        | 2005 | Pcv2a | Pre-Vaccination  | North America |
| KT868378 | USA        | 2005 | Pcv2a | Pre-Vaccination  | North America |
| KT868382 | USA        | 2005 | Pcv2a | Pre-Vaccination  | North America |
| KT868382 | USA        | 2005 | Pcv2a | Pre-Vaccination  | North America |
| KP231099 | Italy      | 2008 | Pcv2a | Post-Vaccination | Europe        |
| FJ870967 | China      | 2008 | Pcv2a | Post-Vaccination | Asia          |
| FJ870968 | China      | 2008 | Pcv2a | Post-Vaccination | Asia          |
| GQ359003 | China      | 2008 | Pcv2a | Post-Vaccination | Asia          |
| HM038034 | China      | 2008 | Pcv2a | Post-Vaccination | Asia          |
| HQ402903 | China      | 2008 | Pcv2a | Post-Vaccination | Asia          |
| HQ591366 | Croatia    | 2008 | Pcv2a | Post-Vaccination | Europe        |
| HQ591374 | Croatia    | 2008 | Pcv2a | Post-Vaccination | Europe        |
| HQ831519 | Portugal   | 2008 | Pcv2a | Post-Vaccination | Europe        |
| HQ831520 | Portugal   | 2008 | Pcv2a | Post-Vaccination | Europe        |
| HQ831522 | Portugal   | 2008 | Pcv2a | Post-Vaccination | Europe        |
| HQ831536 | Portugal   | 2008 | Pcv2a | Post-Vaccination | Europe        |
| KC618389 | USA        | 2008 | Pcv2a | Post-Vaccination | North America |
| KT868452 | USA        | 2008 | Pcv2a | Post-Vaccination | North America |
| KT868479 | USA        | 2008 | Pcv2a | Post-Vaccination | North America |
| KT868482 | USA        | 2008 | Pcv2a | Post-Vaccination | North America |
| KT868491 | USA        | 2008 | Pcv2a | Post-Vaccination | North America |
| GU001709 | China      | 2009 | Pcv2a | Post-Vaccination | Asia          |
| GU370063 | China      | 2009 | Pcv2a | Post-Vaccination | Asia          |
| GU370064 | China      | 2009 | Pcv2a | Post-Vaccination | Asia          |
| HQ378164 | Serbia     | 2009 | Pcv2a | Post-Vaccination | Europe        |
| HQ378165 | Serbia     | 2009 | Pcv2a | Post-Vaccination | Europe        |
| HQ831539 | Portugal   | 2009 | Pcv2a | Post-Vaccination | Europe        |
| JN133305 | Slovakia   | 2009 | Pcv2a | Post-Vaccination | Europe        |
| KF850458 | China      | 2009 | Pcv2a | Post-Vaccination | Asia          |
| KT868285 | USA        | 2009 | Pcv2a | Post-Vaccination | North America |
| KT868418 | USA        | 2009 | Pcv2a | Post-Vaccination | North America |
| KP231100 | Italy      | 2010 | Pcv2a | Post-Vaccination | Europe        |
| HQ378166 | Serbia     | 2010 | Pcv2a | Post-Vaccination | Europe        |
| JF317584 | SouthKorea | 2010 | Pcv2a | Post-Vaccination | Asia          |
| JF682791 | China      | 2010 | Pcv2a | Post-Vaccination | Asia          |
| KC800634 | China      | 2010 | Pcv2a | Post-Vaccination | Asia          |
| KJ094600 | Brazil     | 2010 | Pcv2a | Post-Vaccination | South America |
| KJ094601 | Brazil     | 2010 | Pcv2a | Post-Vaccination | South America |
| KJ094603 | Brazil     | 2010 | Pcv2a | Post-Vaccination | South America |
| JF682793 | China      | 2011 | Pcv2a | Post-Vaccination | Asia          |
| JF682794 | China      | 2011 | Pcv2a | Post-Vaccination | Asia          |
| JF928003 | China      | 2011 | Pcv2a | Post-Vaccination | Asia          |
| JN639856 | China      | 2011 | Pcv2a | Post-Vaccination | Asia          |
| JX948774 | China      | 2011 | Pcv2a | Post-Vaccination | Asia          |
| JX982223 | China      | 2011 | Pcv2a | Post-Vaccination | Asia          |
| JX982225 | China      | 2011 | Pcv2a | Post-Vaccination | Asia          |
| KC800635 | China      | 2011 | Pcv2a | Post-Vaccination | Asia          |
| KF850466 | China      | 2011 | Pcv2a | Post-Vaccination | Asia          |
| KF850468 | China      | 2011 | Pcv2a | Post-Vaccination | Asia          |

Supplementary table 1

|          |            |      |       |                  |               |
|----------|------------|------|-------|------------------|---------------|
| KM191038 | USA        | 2011 | Pcv2a | Post-Vaccination | North America |
| KM191039 | USA        | 2011 | Pcv2a | Post-Vaccination | North America |
| KM191040 | USA        | 2011 | Pcv2a | Post-Vaccination | North America |
| KM191041 | USA        | 2011 | Pcv2a | Post-Vaccination | North America |
| KM191127 | Mexico     | 2011 | Pcv2a | Post-Vaccination | South America |
| KM191128 | Mexico     | 2011 | Pcv2a | Post-Vaccination | South America |
| KT868029 | USA        | 2011 | Pcv2a | Post-Vaccination | North America |
| KT868034 | USA        | 2011 | Pcv2a | Post-Vaccination | North America |
| KP231101 | Italy      | 2012 | Pcv2a | Post-Vaccination | Europe        |
| KC188796 | SouthKorea | 2012 | Pcv2a | Post-Vaccination | Asia          |
| KC514989 | China      | 2012 | Pcv2a | Post-Vaccination | Asia          |
| KC514996 | China      | 2012 | Pcv2a | Post-Vaccination | Asia          |
| KC515002 | China      | 2012 | Pcv2a | Post-Vaccination | Asia          |
| KC515024 | China      | 2012 | Pcv2a | Post-Vaccination | Asia          |
| KC515025 | China      | 2012 | Pcv2a | Post-Vaccination | Asia          |
| KC800636 | China      | 2012 | Pcv2a | Post-Vaccination | Asia          |
| KF027495 | China      | 2012 | Pcv2a | Post-Vaccination | Asia          |
| KJ680365 | China      | 2012 | Pcv2a | Post-Vaccination | Asia          |
| KJ729073 | India      | 2012 | Pcv2a | Post-Vaccination | Asia          |
| KM190998 | USA        | 2012 | Pcv2a | Post-Vaccination | North America |
| KT867992 | USA        | 2012 | Pcv2a | Post-Vaccination | North America |
| KT867995 | USA        | 2012 | Pcv2a | Post-Vaccination | North America |
| KT867997 | USA        | 2012 | Pcv2a | Post-Vaccination | North America |
| KT867998 | USA        | 2012 | Pcv2a | Post-Vaccination | North America |
| KT867999 | USA        | 2012 | Pcv2a | Post-Vaccination | North America |
| KT868000 | USA        | 2012 | Pcv2a | Post-Vaccination | North America |
| KT868001 | USA        | 2012 | Pcv2a | Post-Vaccination | North America |
| KT868049 | USA        | 2012 | Pcv2a | Post-Vaccination | North America |
| KT868373 | USA        | 2012 | Pcv2a | Post-Vaccination | North America |
| KT868377 | USA        | 2012 | Pcv2a | Post-Vaccination | North America |
| KT868381 | USA        | 2012 | Pcv2a | Post-Vaccination | North America |
| KT868384 | USA        | 2012 | Pcv2a | Post-Vaccination | North America |
| KT868385 | USA        | 2012 | Pcv2a | Post-Vaccination | North America |
| KT868388 | USA        | 2012 | Pcv2a | Post-Vaccination | North America |
| KT868390 | USA        | 2012 | Pcv2a | Post-Vaccination | North America |
| KT868392 | USA        | 2012 | Pcv2a | Post-Vaccination | North America |
| KT868393 | USA        | 2012 | Pcv2a | Post-Vaccination | North America |
| KT868394 | USA        | 2012 | Pcv2a | Post-Vaccination | North America |
| KT868395 | USA        | 2012 | Pcv2a | Post-Vaccination | North America |
| KT868396 | USA        | 2012 | Pcv2a | Post-Vaccination | North America |
| KT868397 | USA        | 2012 | Pcv2a | Post-Vaccination | North America |
| KT868398 | USA        | 2012 | Pcv2a | Post-Vaccination | North America |
| KT868399 | USA        | 2012 | Pcv2a | Post-Vaccination | North America |
| KT868400 | USA        | 2012 | Pcv2a | Post-Vaccination | North America |
| KT868401 | USA        | 2012 | Pcv2a | Post-Vaccination | North America |
| KT868402 | USA        | 2012 | Pcv2a | Post-Vaccination | North America |
| KT868403 | USA        | 2012 | Pcv2a | Post-Vaccination | North America |
| KT868404 | USA        | 2012 | Pcv2a | Post-Vaccination | North America |
| KT868405 | USA        | 2012 | Pcv2a | Post-Vaccination | North America |
| KT868406 | USA        | 2012 | Pcv2a | Post-Vaccination | North America |
| KT868407 | USA        | 2012 | Pcv2a | Post-Vaccination | North America |
| KT868408 | USA        | 2012 | Pcv2a | Post-Vaccination | North America |
| KT868409 | USA        | 2012 | Pcv2a | Post-Vaccination | North America |

Supplementary table 1

|          |             |      |       |                  |               |
|----------|-------------|------|-------|------------------|---------------|
| KT868410 | USA         | 2012 | Pcv2a | Post-Vaccination | North America |
| KT868411 | USA         | 2012 | Pcv2a | Post-Vaccination | North America |
| KT868412 | USA         | 2012 | Pcv2a | Post-Vaccination | North America |
| KT868413 | USA         | 2012 | Pcv2a | Post-Vaccination | North America |
| KT868435 | USA         | 2012 | Pcv2a | Post-Vaccination | North America |
| KT868440 | USA         | 2012 | Pcv2a | Post-Vaccination | North America |
| KM191054 | USA         | 2013 | Pcv2a | Post-Vaccination | North America |
| KM191069 | USA         | 2013 | Pcv2a | Post-Vaccination | North America |
| KM191109 | USA         | 2013 | Pcv2a | Post-Vaccination | North America |
| KM191118 | USA         | 2013 | Pcv2a | Post-Vaccination | North America |
| KM191122 | USA         | 2013 | Pcv2a | Post-Vaccination | North America |
| KM191123 | USA         | 2013 | Pcv2a | Post-Vaccination | North America |
| KM360057 | China       | 2013 | Pcv2a | Post-Vaccination | Asia          |
| KP081543 | China       | 2013 | Pcv2a | Post-Vaccination | Asia          |
| KP245929 | China       | 2013 | Pcv2a | Post-Vaccination | Asia          |
| KP670420 | China       | 2013 | Pcv2a | Post-Vaccination | Asia          |
| KT867860 | USA         | 2013 | Pcv2a | Post-Vaccination | North America |
| KT867862 | USA         | 2013 | Pcv2a | Post-Vaccination | North America |
| KT867869 | USA         | 2013 | Pcv2a | Post-Vaccination | North America |
| KT867903 | USA         | 2013 | Pcv2a | Post-Vaccination | North America |
| KT867923 | USA         | 2013 | Pcv2a | Post-Vaccination | North America |
| KT867924 | USA         | 2013 | Pcv2a | Post-Vaccination | North America |
| KT867925 | USA         | 2013 | Pcv2a | Post-Vaccination | North America |
| KT867926 | USA         | 2013 | Pcv2a | Post-Vaccination | North America |
| KT867927 | USA         | 2013 | Pcv2a | Post-Vaccination | North America |
| KT867928 | USA         | 2013 | Pcv2a | Post-Vaccination | North America |
| KT867929 | USA         | 2013 | Pcv2a | Post-Vaccination | North America |
| KT867930 | USA         | 2013 | Pcv2a | Post-Vaccination | North America |
| KT867931 | USA         | 2013 | Pcv2a | Post-Vaccination | North America |
| KT867932 | USA         | 2013 | Pcv2a | Post-Vaccination | North America |
| KT867933 | USA         | 2013 | Pcv2a | Post-Vaccination | North America |
| KT867934 | USA         | 2013 | Pcv2a | Post-Vaccination | North America |
| KT867952 | USA         | 2013 | Pcv2a | Post-Vaccination | North America |
| KT868369 | USA         | 2013 | Pcv2a | Post-Vaccination | North America |
| KT868436 | USA         | 2013 | Pcv2a | Post-Vaccination | North America |
| KM035762 | China       | 2014 | Pcv2a | Post-Vaccination | Asia          |
| KM067385 | China       | 2014 | Pcv2a | Post-Vaccination | Asia          |
| KM880087 | China       | 2014 | Pcv2a | Post-Vaccination | Asia          |
| KM880088 | China       | 2014 | Pcv2a | Post-Vaccination | Asia          |
| KM880089 | China       | 2014 | Pcv2a | Post-Vaccination | Asia          |
| KP081549 | China       | 2014 | Pcv2a | Post-Vaccination | Asia          |
| KP081551 | China       | 2014 | Pcv2a | Post-Vaccination | Asia          |
| KR058357 | China       | 2014 | Pcv2a | Post-Vaccination | Asia          |
| KT284886 | China       | 2015 | Pcv2a | Post-Vaccination | Asia          |
| KT284887 | China       | 2015 | Pcv2a | Post-Vaccination | Asia          |
| KT284888 | China       | 2015 | Pcv2a | Post-Vaccination | Asia          |
| KT284889 | China       | 2015 | Pcv2a | Post-Vaccination | Asia          |
| AF201311 | France      | 2000 | Pcv2b | Pre-Vaccination  | Europe        |
| AF201897 | Netherlands | 2000 | Pcv2b | Pre-Vaccination  | Europe        |
| DQ861900 | Brazil      | 2002 | Pcv2b | Pre-Vaccination  | South America |
| DQ861901 | Brazil      | 2002 | Pcv2b | Pre-Vaccination  | South America |
| DQ915586 | Greece      | 2002 | Pcv2b | Pre-Vaccination  | Europe        |
| FJ644919 | China       | 2002 | Pcv2b | Pre-Vaccination  | Asia          |

Supplementary table 1

|          |          |      |       |                 |               |
|----------|----------|------|-------|-----------------|---------------|
| EU136720 | Denmark  | 2002 | Pcv2b | Pre-Vaccination | Europe        |
| EU136718 | Denmark  | 2002 | Pcv2b | Pre-Vaccination | Europe        |
| EU136719 | Denmark  | 2002 | Pcv2b | Pre-Vaccination | Europe        |
| EF565362 | Denmark  | 2003 | Pcv2b | Pre-Vaccination | Europe        |
| AY424404 | Austria  | 2003 | Pcv2b | Pre-Vaccination | Europe        |
| EF565366 | Denmark  | 2003 | Pcv2b | Pre-Vaccination | Europe        |
| EF565355 | Denmark  | 2003 | Pcv2b | Pre-Vaccination | Europe        |
| EF565364 | Denmark  | 2003 | Pcv2b | Pre-Vaccination | Europe        |
| EF565350 | Denmark  | 2003 | Pcv2b | Pre-Vaccination | Europe        |
| DQ861899 | Brazil   | 2003 | Pcv2b | Pre-Vaccination | South America |
| AY217743 | China    | 2003 | Pcv2b | Pre-Vaccination | Asia          |
| DQ861897 | Brazil   | 2003 | Pcv2b | Pre-Vaccination | South America |
| DQ861898 | Brazil   | 2003 | Pcv2b | Pre-Vaccination | South America |
| AY256457 | Hungary  | 2003 | Pcv2b | Pre-Vaccination | Europe        |
| DQ233257 | Romania  | 2003 | Pcv2b | Pre-Vaccination | Europe        |
| AF538325 | China    | 2003 | Pcv2b | Pre-Vaccination | Asia          |
| AY177626 | China    | 2003 | Pcv2b | Pre-Vaccination | Asia          |
| KC835190 | Brazil   | 2003 | Pcv2b | Pre-Vaccination | South America |
| EF565357 | Denmark  | 2003 | Pcv2b | Pre-Vaccination | Europe        |
| DQ915587 | Greece   | 2003 | Pcv2b | Pre-Vaccination | Europe        |
| AY256460 | Hungary  | 2003 | Pcv2b | Pre-Vaccination | Europe        |
| AY181945 | China    | 2003 | Pcv2b | Pre-Vaccination | Asia          |
| AY288134 | China    | 2003 | Pcv2b | Pre-Vaccination | Asia          |
| EU136712 | Denmark  | 2003 | Pcv2b | Pre-Vaccination | Europe        |
| EF565345 | Denmark  | 2003 | Pcv2b | Pre-Vaccination | Europe        |
| EU136713 | Denmark  | 2003 | Pcv2b | Pre-Vaccination | Europe        |
| EF565347 | Denmark  | 2003 | Pcv2b | Pre-Vaccination | Europe        |
| EF565361 | Denmark  | 2003 | Pcv2b | Pre-Vaccination | Europe        |
| EU136716 | Denmark  | 2003 | Pcv2b | Pre-Vaccination | Europe        |
| EF565363 | Denmark  | 2003 | Pcv2b | Pre-Vaccination | Europe        |
| EF565346 | Denmark  | 2003 | Pcv2b | Pre-Vaccination | Europe        |
| EF565368 | Denmark  | 2003 | Pcv2b | Pre-Vaccination | Europe        |
| EU136715 | Denmark  | 2003 | Pcv2b | Pre-Vaccination | Europe        |
| EU136714 | Denmark  | 2003 | Pcv2b | Pre-Vaccination | Europe        |
| EF565348 | Denmark  | 2003 | Pcv2b | Pre-Vaccination | Europe        |
| EF565343 | Denmark  | 2003 | Pcv2b | Pre-Vaccination | Europe        |
| EF565353 | Denmark  | 2003 | Pcv2b | Pre-Vaccination | Europe        |
| EF565359 | Denmark  | 2003 | Pcv2b | Pre-Vaccination | Europe        |
| EF565352 | Denmark  | 2003 | Pcv2b | Pre-Vaccination | Europe        |
| EF565356 | Denmark  | 2003 | Pcv2b | Pre-Vaccination | Europe        |
| EF565367 | Denmark  | 2003 | Pcv2b | Pre-Vaccination | Europe        |
| AY291316 | China    | 2003 | Pcv2b | Pre-Vaccination | Asia          |
| EF565354 | Denmark  | 2003 | Pcv2b | Pre-Vaccination | Europe        |
| EF565351 | Denmark  | 2003 | Pcv2b | Pre-Vaccination | Europe        |
| EF565349 | Denmark  | 2003 | Pcv2b | Pre-Vaccination | Europe        |
| EF565365 | Denmark  | 2003 | Pcv2b | Pre-Vaccination | Europe        |
| AY391729 | China    | 2003 | Pcv2b | Pre-Vaccination | Asia          |
| EF565358 | Denmark  | 2003 | Pcv2b | Pre-Vaccination | Europe        |
| EF565344 | Denmark  | 2003 | Pcv2b | Pre-Vaccination | Europe        |
| EF565342 | Denmark  | 2003 | Pcv2b | Pre-Vaccination | Europe        |
| AY424405 | Austria  | 2003 | Pcv2b | Pre-Vaccination | Europe        |
| HQ831524 | Portugal | 2003 | Pcv2b | Pre-Vaccination | Europe        |
| HQ831521 | Portugal | 2004 | Pcv2b | Pre-Vaccination | Europe        |

Supplementary table 1

|          |             |      |       |                 |               |
|----------|-------------|------|-------|-----------------|---------------|
| EU346945 | China       | 2004 | Pcv2b | Pre-Vaccination | Asia          |
| EU346945 | China       | 2004 | Pcv2b | Pre-Vaccination | Asia          |
| AY322002 | France      | 2004 | Pcv2b | Pre-Vaccination | Europe        |
| AY484409 | Netherlands | 2004 | Pcv2b | Pre-Vaccination | Europe        |
| DQ861895 | Brazil      | 2004 | Pcv2b | Pre-Vaccination | South America |
| DQ861896 | Brazil      | 2004 | Pcv2b | Pre-Vaccination | South America |
| AY536755 | China       | 2004 | Pcv2b | Pre-Vaccination | Asia          |
| DQ861902 | Brazil      | 2004 | Pcv2b | Pre-Vaccination | South America |
| AY321991 | France      | 2004 | Pcv2b | Pre-Vaccination | Europe        |
| AY484415 | Netherlands | 2004 | Pcv2b | Pre-Vaccination | Europe        |
| AY321990 | France      | 2004 | Pcv2b | Pre-Vaccination | Europe        |
| KC835191 | Brazil      | 2004 | Pcv2b | Pre-Vaccination | South America |
| AY321997 | France      | 2004 | Pcv2b | Pre-Vaccination | Europe        |
| AY321998 | France      | 2004 | Pcv2b | Pre-Vaccination | Europe        |
| AY613854 | China       | 2004 | Pcv2b | Pre-Vaccination | Asia          |
| AY321984 | France      | 2004 | Pcv2b | Pre-Vaccination | Europe        |
| AY321985 | France      | 2004 | Pcv2b | Pre-Vaccination | Europe        |
| AY321986 | France      | 2004 | Pcv2b | Pre-Vaccination | Europe        |
| AY484412 | Netherlands | 2004 | Pcv2b | Pre-Vaccination | Europe        |
| AY321989 | France      | 2004 | Pcv2b | Pre-Vaccination | Europe        |
| AY321988 | France      | 2004 | Pcv2b | Pre-Vaccination | Europe        |
| AY484411 | Netherlands | 2004 | Pcv2b | Pre-Vaccination | Europe        |
| AY484413 | Netherlands | 2004 | Pcv2b | Pre-Vaccination | Europe        |
| AY484408 | Netherlands | 2004 | Pcv2b | Pre-Vaccination | Europe        |
| AY579893 | China       | 2004 | Pcv2b | Pre-Vaccination | Asia          |
| AY651850 | China       | 2004 | Pcv2b | Pre-Vaccination | Asia          |
| AY604430 | China       | 2004 | Pcv2b | Pre-Vaccination | Asia          |
| AY321987 | France      | 2004 | Pcv2b | Pre-Vaccination | Europe        |
| AY686764 | China       | 2004 | Pcv2b | Pre-Vaccination | Asia          |
| AY732494 | China       | 2004 | Pcv2b | Pre-Vaccination | Asia          |
| AY484416 | Netherlands | 2004 | Pcv2b | Pre-Vaccination | Europe        |
| AY321996 | France      | 2004 | Pcv2b | Pre-Vaccination | Europe        |
| AY321995 | France      | 2004 | Pcv2b | Pre-Vaccination | Europe        |
| AY682990 | China       | 2004 | Pcv2b | Pre-Vaccination | Asia          |
| AY321994 | France      | 2004 | Pcv2b | Pre-Vaccination | Europe        |
| AY321999 | France      | 2004 | Pcv2b | Pre-Vaccination | Europe        |
| AY322001 | France      | 2004 | Pcv2b | Pre-Vaccination | Europe        |
| AY321992 | France      | 2004 | Pcv2b | Pre-Vaccination | Europe        |
| AY322000 | France      | 2004 | Pcv2b | Pre-Vaccination | Europe        |
| AY641542 | China       | 2004 | Pcv2b | Pre-Vaccination | Asia          |
| AY691679 | China       | 2004 | Pcv2b | Pre-Vaccination | Asia          |
| AM086384 | China       | 2004 | Pcv2b | Pre-Vaccination | Asia          |
| AY536756 | China       | 2004 | Pcv2b | Pre-Vaccination | Asia          |
| AY682993 | China       | 2004 | Pcv2b | Pre-Vaccination | Asia          |
| AY596823 | China       | 2004 | Pcv2b | Pre-Vaccination | Asia          |
| AY686762 | China       | 2004 | Pcv2b | Pre-Vaccination | Asia          |
| AY484414 | Netherlands | 2004 | Pcv2b | Pre-Vaccination | Europe        |
| HM038020 | China       | 2004 | Pcv2b | Pre-Vaccination | Asia          |
| HQ831531 | Portugal    | 2004 | Pcv2b | Pre-Vaccination | Europe        |
| HM038018 | China       | 2005 | Pcv2b | Pre-Vaccination | Asia          |
| HM038016 | China       | 2005 | Pcv2b | Pre-Vaccination | Asia          |
| HM038024 | China       | 2005 | Pcv2b | Pre-Vaccination | Asia          |
| DQ141322 | China       | 2005 | Pcv2b | Pre-Vaccination | Asia          |



Supplementary table 1

|          |             |      |       |                  |               |
|----------|-------------|------|-------|------------------|---------------|
| JX512857 | Switzerland | 2005 | Pcv2b | Pre-Vaccination  | Europe        |
| AY969004 | China       | 2005 | Pcv2b | Pre-Vaccination  | Asia          |
| JX512859 | Switzerland | 2005 | Pcv2b | Pre-Vaccination  | Europe        |
| FJ905466 | SouthKorea  | 2005 | Pcv2b | Pre-Vaccination  | Asia          |
| AY188355 | China       | 2005 | Pcv2b | Pre-Vaccination  | Asia          |
| KC835193 | Brazil      | 2005 | Pcv2b | Pre-Vaccination  | South America |
| KC835192 | Brazil      | 2005 | Pcv2b | Pre-Vaccination  | South America |
| FJ644561 | China       | 2005 | Pcv2b | Pre-Vaccination  | Asia          |
| HM009336 | Slovakia    | 2005 | Pcv2b | Pre-Vaccination  | Europe        |
| AY916791 | China       | 2005 | Pcv2b | Pre-Vaccination  | Asia          |
| DQ629116 | USA         | 2005 | Pcv2b | Pre-Vaccination  | North America |
| DQ629117 | USA         | 2005 | Pcv2b | Pre-Vaccination  | North America |
| DQ629118 | USA         | 2005 | Pcv2b | Pre-Vaccination  | North America |
| DQ220729 | Canada      | 2005 | Pcv2b | Pre-Vaccination  | North America |
| DQ220736 | Canada      | 2005 | Pcv2b | Pre-Vaccination  | North America |
| DQ220731 | Canada      | 2005 | Pcv2b | Pre-Vaccination  | North America |
| DQ220730 | Canada      | 2005 | Pcv2b | Pre-Vaccination  | North America |
| DQ220739 | Canada      | 2005 | Pcv2b | Pre-Vaccination  | North America |
| DQ220734 | Canada      | 2005 | Pcv2b | Pre-Vaccination  | North America |
| DQ220728 | Canada      | 2005 | Pcv2b | Pre-Vaccination  | North America |
| DQ220727 | Canada      | 2005 | Pcv2b | Pre-Vaccination  | North America |
| DQ220733 | Canada      | 2005 | Pcv2b | Pre-Vaccination  | North America |
| DQ220735 | Canada      | 2005 | Pcv2b | Pre-Vaccination  | North America |
| DQ220732 | Canada      | 2005 | Pcv2b | Pre-Vaccination  | North America |
| HQ713495 | USA         | 2005 | Pcv2b | Pre-Vaccination  | North America |
| HQ148879 | Cuba        | 2005 | Pcv2b | Pre-Vaccination  | South America |
| EF394779 | Canada      | 2005 | Pcv2b | Pre-Vaccination  | North America |
| EF394778 | Canada      | 2005 | Pcv2b | Pre-Vaccination  | North America |
| DQ629119 | USA         | 2005 | Pcv2b | Pre-Vaccination  | North America |
| DQ629115 | USA         | 2005 | Pcv2b | Pre-Vaccination  | North America |
| EF394777 | Canada      | 2005 | Pcv2b | Pre-Vaccination  | North America |
| FJ905461 | SouthKorea  | 2005 | Pcv2b | Pre-Vaccination  | Asia          |
| FJ905462 | SouthKorea  | 2005 | Pcv2b | Pre-Vaccination  | Asia          |
| DQ220737 | Canada      | 2005 | Pcv2b | Pre-Vaccination  | North America |
| DQ220738 | Canada      | 2005 | Pcv2b | Pre-Vaccination  | North America |
| FJ644559 | China       | 2005 | Pcv2b | Pre-Vaccination  | Asia          |
| FJ644563 | China       | 2005 | Pcv2b | Pre-Vaccination  | Asia          |
| FJ644562 | China       | 2005 | Pcv2b | Pre-Vaccination  | Asia          |
| JX512860 | Switzerland | 2005 | Pcv2b | Pre-Vaccination  | Europe        |
| FJ644558 | China       | 2005 | Pcv2b | Pre-Vaccination  | Asia          |
| AY849938 | China       | 2005 | Pcv2b | Pre-Vaccination  | Asia          |
| FJ644555 | China       | 2005 | Pcv2b | Pre-Vaccination  | Asia          |
| DQ104420 | China       | 2005 | Pcv2b | Pre-Vaccination  | Asia          |
| FJ905465 | SouthKorea  | 2005 | Pcv2b | Pre-Vaccination  | Asia          |
| DQ104422 | China       | 2005 | Pcv2b | Pre-Vaccination  | Asia          |
| FJ905464 | SouthKorea  | 2005 | Pcv2b | Pre-Vaccination  | Asia          |
| DQ017036 | China       | 2005 | Pcv2b | Pre-Vaccination  | Asia          |
| KF374705 | Brazil      | 2005 | Pcv2b | Pre-Vaccination  | South America |
| HQ831529 | Portugal    | 2005 | Pcv2b | Pre-Vaccination  | Europe        |
| GU247987 | China       | 2005 | Pcv2b | Pre-Vaccination  | Asia          |
| GU247992 | China       | 2005 | Pcv2b | Pre-Vaccination  | Asia          |
| HQ831534 | Portugal    | 2008 | Pcv2b | Post-Vaccination | Europe        |
| EU684164 | Australia   | 2008 | Pcv2b | Post-Vaccination | Oceania       |

Supplementary table 1

|          |            |      |       |                  |               |
|----------|------------|------|-------|------------------|---------------|
| EU555439 | China      | 2008 | Pcv2b | Post-Vaccination | Asia          |
| KP231134 | Italy      | 2008 | Pcv2b | Post-Vaccination | Europe        |
| KP231130 | Italy      | 2008 | Pcv2b | Post-Vaccination | Europe        |
| KF742546 | China      | 2008 | Pcv2b | Post-Vaccination | Asia          |
| FJ716703 | China      | 2008 | Pcv2b | Post-Vaccination | Asia          |
| HM776446 | China      | 2008 | Pcv2b | Post-Vaccination | Asia          |
| HM776445 | China      | 2008 | Pcv2b | Post-Vaccination | Asia          |
| KP231129 | Italy      | 2008 | Pcv2b | Post-Vaccination | Europe        |
| FJ233906 | Canada     | 2008 | Pcv2b | Post-Vaccination | North America |
| FJ233905 | Canada     | 2008 | Pcv2b | Post-Vaccination | North America |
| KP231102 | Italy      | 2008 | Pcv2b | Post-Vaccination | Europe        |
| HQ591375 | Croatia    | 2008 | Pcv2b | Post-Vaccination | Europe        |
| HQ591370 | Croatia    | 2008 | Pcv2b | Post-Vaccination | Europe        |
| HQ591371 | Croatia    | 2008 | Pcv2b | Post-Vaccination | Europe        |
| HQ591365 | Croatia    | 2008 | Pcv2b | Post-Vaccination | Europe        |
| EU909688 | Belgium    | 2008 | Pcv2b | Post-Vaccination | Europe        |
| HQ591377 | Croatia    | 2008 | Pcv2b | Post-Vaccination | Europe        |
| HQ591376 | Croatia    | 2008 | Pcv2b | Post-Vaccination | Europe        |
| FJ644930 | China      | 2008 | Pcv2b | Post-Vaccination | Asia          |
| FJ804417 | Germany    | 2008 | Pcv2b | Post-Vaccination | Europe        |
| GU325754 | China      | 2008 | Pcv2b | Post-Vaccination | Asia          |
| HQ231329 | Germany    | 2008 | Pcv2b | Post-Vaccination | Europe        |
| KP231104 | Italy      | 2008 | Pcv2b | Post-Vaccination | Europe        |
| KP231132 | Italy      | 2008 | Pcv2b | Post-Vaccination | Europe        |
| HQ831537 | Portugal   | 2008 | Pcv2b | Post-Vaccination | Europe        |
| KP231105 | Italy      | 2008 | Pcv2b | Post-Vaccination | Europe        |
| KP231133 | Italy      | 2008 | Pcv2b | Post-Vaccination | Europe        |
| GQ174519 | China      | 2008 | Pcv2b | Post-Vaccination | Asia          |
| KP231103 | Italy      | 2008 | Pcv2b | Post-Vaccination | Europe        |
| KP231135 | Italy      | 2008 | Pcv2b | Post-Vaccination | Europe        |
| FJ948167 | China      | 2008 | Pcv2b | Post-Vaccination | Asia          |
| HM038028 | China      | 2008 | Pcv2b | Post-Vaccination | Asia          |
| KJ128272 | Lithuania  | 2009 | Pcv2b | Post-Vaccination | Europe        |
| HM776451 | China      | 2009 | Pcv2b | Post-Vaccination | Asia          |
| GU083582 | China      | 2009 | Pcv2b | Post-Vaccination | Asia          |
| GQ996404 | China      | 2009 | Pcv2b | Post-Vaccination | Asia          |
| HM776444 | China      | 2009 | Pcv2b | Post-Vaccination | Asia          |
| KJ128270 | Lithuania  | 2009 | Pcv2b | Post-Vaccination | Europe        |
| KJ128273 | Lithuania  | 2009 | Pcv2b | Post-Vaccination | Europe        |
| KP231154 | Italy      | 2009 | Pcv2b | Post-Vaccination | Europe        |
| KP231155 | Italy      | 2009 | Pcv2b | Post-Vaccination | Europe        |
| KJ128269 | Lithuania  | 2009 | Pcv2b | Post-Vaccination | Europe        |
| HQ591378 | Croatia    | 2009 | Pcv2b | Post-Vaccination | Europe        |
| JF317580 | SouthKorea | 2009 | Pcv2b | Post-Vaccination | Asia          |
| GU799576 | USA        | 2009 | Pcv2b | Post-Vaccination | North America |
| JF317576 | SouthKorea | 2009 | Pcv2b | Post-Vaccination | Asia          |
| JF317565 | SouthKorea | 2009 | Pcv2b | Post-Vaccination | Asia          |
| HQ591380 | Croatia    | 2009 | Pcv2b | Post-Vaccination | Europe        |
| GU325766 | China      | 2009 | Pcv2b | Post-Vaccination | Asia          |
| JF317570 | SouthKorea | 2009 | Pcv2b | Post-Vaccination | Asia          |
| JF317569 | SouthKorea | 2009 | Pcv2b | Post-Vaccination | Asia          |
| JF317572 | SouthKorea | 2009 | Pcv2b | Post-Vaccination | Asia          |
| JF317579 | SouthKorea | 2009 | Pcv2b | Post-Vaccination | Asia          |

Supplementary table 1

|          |            |      |       |                  |               |
|----------|------------|------|-------|------------------|---------------|
| GQ449672 | China      | 2009 | Pcv2b | Post-Vaccination | Asia          |
| GU325764 | China      | 2009 | Pcv2b | Post-Vaccination | Asia          |
| JF317575 | SouthKorea | 2009 | Pcv2b | Post-Vaccination | Asia          |
| HQ231328 | Germany    | 2009 | Pcv2b | Post-Vaccination | Europe        |
| HQ831538 | Portugal   | 2009 | Pcv2b | Post-Vaccination | Europe        |
| GU938303 | China      | 2009 | Pcv2b | Post-Vaccination | Asia          |
| HQ378159 | Serbia     | 2009 | Pcv2b | Post-Vaccination | Europe        |
| HM003570 | China      | 2009 | Pcv2b | Post-Vaccination | Asia          |
| HQ378160 | Serbia     | 2009 | Pcv2b | Post-Vaccination | Europe        |
| HM003569 | China      | 2009 | Pcv2b | Post-Vaccination | Asia          |
| KP231143 | Italy      | 2009 | Pcv2b | Post-Vaccination | Europe        |
| HQ378161 | Serbia     | 2009 | Pcv2b | Post-Vaccination | Europe        |
| KP231141 | Italy      | 2009 | Pcv2b | Post-Vaccination | Europe        |
| KP231142 | Italy      | 2009 | Pcv2b | Post-Vaccination | Europe        |
| HQ831540 | Portugal   | 2010 | Pcv2b | Post-Vaccination | Europe        |
| JF317588 | SouthKorea | 2010 | Pcv2b | Post-Vaccination | Asia          |
| JF317585 | SouthKorea | 2010 | Pcv2b | Post-Vaccination | Asia          |
| KP231159 | Italy      | 2010 | Pcv2b | Post-Vaccination | Europe        |
| JQ002672 | China      | 2011 | Pcv2b | Post-Vaccination | Asia          |
| JQ181591 | VietNam    | 2011 | Pcv2b | Post-Vaccination | Asia          |
| JQ181601 | VietNam    | 2011 | Pcv2b | Post-Vaccination | Asia          |
| JQ181590 | VietNam    | 2011 | Pcv2b | Post-Vaccination | Asia          |
| KJ920205 | Germany    | 2011 | Pcv2b | Post-Vaccination | Europe        |
| KF742541 | China      | 2011 | Pcv2b | Post-Vaccination | Asia          |
| KP231116 | Italy      | 2011 | Pcv2b | Post-Vaccination | Europe        |
| KP231115 | Italy      | 2012 | Pcv2b | Post-Vaccination | Europe        |
| KP231164 | Italy      | 2012 | Pcv2b | Post-Vaccination | Europe        |
| KF732649 | China      | 2012 | Pcv2b | Post-Vaccination | Asia          |
| KP231137 | Italy      | 2013 | Pcv2b | Post-Vaccination | Europe        |
| JX099783 | VietNam    | 2009 | Pcv2a | Domestic         | Asia          |
| JQ181596 | VietNam    | 2011 | Pcv2a | Domestic         | Asia          |
| JQ181598 | VietNam    | 2011 | Pcv2a | Domestic         | Asia          |
| JX099784 | VietNam    | 2010 | Pcv2a | Domestic         | Asia          |
| KJ729074 | India      | 2013 | Pcv2a | Domestic         | Asia          |
| JX099780 | VietNam    | 2009 | Pcv2a | Domestic         | Asia          |
| JQ181604 | VietNam    | 2011 | Pcv2a | Domestic         | Asia          |
| JQ181606 | VietNam    | 2011 | Pcv2a | Domestic         | Asia          |
| JQ181588 | VietNam    | 2011 | Pcv2a | Domestic         | Asia          |
| JQ181602 | VietNam    | 2011 | Pcv2a | Domestic         | Asia          |
| JQ181587 | VietNam    | 2011 | Pcv2a | Domestic         | Asia          |
| HQ402903 | China      | 2008 | Pcv2a | Domestic         | Asia          |
| KJ094601 | Brazil     | 2010 | Pcv2a | Domestic         | South America |
| KC800636 | China      | 2012 | Pcv2a | Domestic         | Asia          |
| KC800634 | China      | 2010 | Pcv2a | Domestic         | Asia          |
| JX982225 | China      | 2011 | Pcv2a | Domestic         | Asia          |
| GU001709 | China      | 2009 | Pcv2a | Domestic         | Asia          |
| JX982223 | China      | 2011 | Pcv2a | Domestic         | Asia          |
| KP231137 | Italy      | 2013 | Pcv2b | Domestic         | Europe        |
| JQ002672 | China      | 2011 | Pcv2b | Domestic         | Asia          |
| GU083582 | China      | 2009 | Pcv2b | Domestic         | Asia          |
| HM038028 | China      | 2008 | Pcv2b | Domestic         | Asia          |
| HQ378160 | Serbia     | 2009 | Pcv2b | Domestic         | Europe        |
| JQ181591 | VietNam    | 2011 | Pcv2b | Domestic         | Asia          |

Supplementary table 1

|          |            |      |       |          |               |
|----------|------------|------|-------|----------|---------------|
| JQ181601 | VietNam    | 2011 | Pcv2b | Domestic | Asia          |
| JQ181590 | VietNam    | 2011 | Pcv2b | Domestic | Asia          |
| HQ831540 | Portugal   | 2010 | Pcv2b | Domestic | Europe        |
| KF742546 | China      | 2008 | Pcv2b | Domestic | Asia          |
| HQ591375 | Croatia    | 2008 | Pcv2b | Domestic | Europe        |
| FJ948167 | China      | 2008 | Pcv2b | Domestic | Asia          |
| HM003569 | China      | 2009 | Pcv2b | Domestic | Asia          |
| KP231129 | Italy      | 2008 | Pcv2b | Domestic | Europe        |
| KP231130 | Italy      | 2008 | Pcv2b | Domestic | Europe        |
| KP231134 | Italy      | 2008 | Pcv2b | Domestic | Europe        |
| KC261601 | Brazil     | 2008 | Pcv2b | Domestic | South America |
| HQ831538 | Portugal   | 2009 | Pcv2b | Domestic | Europe        |
| HQ591378 | Croatia    | 2009 | Pcv2b | Domestic | Europe        |
| HQ591370 | Croatia    | 2008 | Pcv2b | Domestic | Europe        |
| HQ591371 | Croatia    | 2008 | Pcv2b | Domestic | Europe        |
| HQ591365 | Croatia    | 2008 | Pcv2b | Domestic | Europe        |
| KP231159 | Italy      | 2010 | Pcv2b | Domestic | Europe        |
| KP231154 | Italy      | 2009 | Pcv2b | Domestic | Europe        |
| KP231155 | Italy      | 2009 | Pcv2b | Domestic | Europe        |
| KJ128269 | Lithuania  | 2009 | Pcv2b | Domestic | Europe        |
| KJ128270 | Lithuania  | 2009 | Pcv2b | Domestic | Europe        |
| JF317580 | SouthKorea | 2009 | Pcv2b | Domestic | Asia          |
| FJ233906 | Canada     | 2008 | Pcv2b | Domestic | North America |
| FJ233905 | Canada     | 2008 | Pcv2b | Domestic | North America |
| GU799576 | USA        | 2009 | Pcv2b | Domestic | North America |
| JF317576 | SouthKorea | 2009 | Pcv2b | Domestic | Asia          |
| JF317565 | SouthKorea | 2009 | Pcv2b | Domestic | Asia          |
| KJ128272 | Lithuania  | 2009 | Pcv2b | Domestic | Europe        |
| KJ128273 | Lithuania  | 2009 | Pcv2b | Domestic | Europe        |
| KJ920205 | Germany    | 2011 | Pcv2b | Domestic | Europe        |
| EU909688 | Belgium    | 2008 | Pcv2b | Domestic | Europe        |
| HQ378161 | Serbia     | 2009 | Pcv2b | Domestic | Europe        |
| HM776444 | China      | 2009 | Pcv2b | Domestic | Asia          |
| HQ378159 | Serbia     | 2009 | Pcv2b | Domestic | Europe        |
| FJ716703 | China      | 2008 | Pcv2b | Domestic | Asia          |
| HM776446 | China      | 2008 | Pcv2b | Domestic | Asia          |
| GQ174519 | China      | 2008 | Pcv2b | Domestic | Asia          |
| JF317588 | SouthKorea | 2010 | Pcv2b | Domestic | Asia          |
| HQ591380 | Croatia    | 2009 | Pcv2b | Domestic | Europe        |
| JF317585 | SouthKorea | 2010 | Pcv2b | Domestic | Asia          |
| GU325766 | China      | 2009 | Pcv2b | Domestic | Asia          |
| HM776445 | China      | 2008 | Pcv2b | Domestic | Asia          |
| KF732649 | China      | 2012 | Pcv2b | Domestic | Asia          |
| EU555439 | China      | 2008 | Pcv2b | Domestic | Asia          |
| HM003570 | China      | 2009 | Pcv2b | Domestic | Asia          |
| JF317570 | SouthKorea | 2009 | Pcv2b | Domestic | Asia          |
| JF317569 | SouthKorea | 2009 | Pcv2b | Domestic | Asia          |
| JF317572 | SouthKorea | 2009 | Pcv2b | Domestic | Asia          |
| HM776451 | China      | 2009 | Pcv2b | Domestic | Asia          |
| KP231105 | Italy      | 2008 | Pcv2b | Domestic | Europe        |
| KP231104 | Italy      | 2008 | Pcv2b | Domestic | Europe        |
| KP231103 | Italy      | 2008 | Pcv2b | Domestic | Europe        |
| KP231102 | Italy      | 2008 | Pcv2b | Domestic | Europe        |

Supplementary table 1

|           |            |      |       |          |               |
|-----------|------------|------|-------|----------|---------------|
| KP231135  | Italy      | 2008 | Pcv2b | Domestic | Europe        |
| KP231132  | Italy      | 2008 | Pcv2b | Domestic | Europe        |
| KP231133  | Italy      | 2008 | Pcv2b | Domestic | Europe        |
| HQ831534  | Portugal   | 2008 | Pcv2b | Domestic | Europe        |
| HQ591377  | Croatia    | 2008 | Pcv2b | Domestic | Europe        |
| HQ591376  | Croatia    | 2008 | Pcv2b | Domestic | Europe        |
| FJ644930  | China      | 2008 | Pcv2b | Domestic | Asia          |
| KP231141  | Italy      | 2009 | Pcv2b | Domestic | Europe        |
| KP231143  | Italy      | 2009 | Pcv2b | Domestic | Europe        |
| KP231142  | Italy      | 2009 | Pcv2b | Domestic | Europe        |
| HQ831537  | Portugal   | 2008 | Pcv2b | Domestic | Europe        |
| HQ231329  | Germany    | 2008 | Pcv2b | Domestic | Europe        |
| FJ804417  | Germany    | 2009 | Pcv2b | Domestic | Europe        |
| JF317579  | SouthKorea | 2009 | Pcv2b | Domestic | Asia          |
| KF742541  | China      | 2011 | Pcv2b | Domestic | Asia          |
| KP231164  | Italy      | 2012 | Pcv2b | Domestic | Europe        |
| KP231115  | Italy      | 2012 | Pcv2b | Domestic | Europe        |
| GQ449672  | China      | 2009 | Pcv2b | Domestic | Asia          |
| GU938303  | China      | 2009 | Pcv2b | Domestic | Asia          |
| HQ231328  | Germany    | 2009 | Pcv2b | Domestic | Europe        |
| GQ996404  | China      | 2009 | Pcv2b | Domestic | Asia          |
| GU325754  | China      | 2008 | Pcv2b | Domestic | Asia          |
| 1397-2011 | Italy      | 2011 | Pcv2b | Domestic | Europe        |
| GU325764  | China      | 2009 | Pcv2b | Domestic | Asia          |
| JF317575  | SouthKorea | 2009 | Pcv2b | Domestic | Asia          |
| EU684164  | Australia  | 2008 | Pcv2b | Domestic | Oceania       |
| JF827599  | China      | 2010 | Pcv2d | Domestic | Asia          |
| JX982220  | China      | 2011 | Pcv2d | Domestic | Asia          |
| KJ680355  | China      | 2010 | Pcv2d | Domestic | Asia          |
| KC823057  | China      | 2012 | Pcv2d | Domestic | Asia          |
| KP231168  | Italy      | 2014 | Pcv2d | Domestic | Europe        |
| JX682407  | China      | 2011 | Pcv2d | Domestic | Asia          |
| JX204386  | China      | 2012 | Pcv2d | Domestic | Asia          |
| GQ359010  | China      | 2008 | Pcv2d | Domestic | Asia          |
| KJ680343  | China      | 2010 | Pcv2d | Domestic | Asia          |
| HQ693093  | China      | 2010 | Pcv2d | Domestic | Asia          |
| JF272498  | China      | 2009 | Pcv2d | Domestic | Asia          |
| JX948785  | China      | 2011 | Pcv2d | Domestic | Asia          |
| GU325760  | China      | 2009 | Pcv2d | Domestic | Asia          |
| KC821783  | China      | 2013 | Pcv2d | Domestic | Asia          |
| JX948776  | China      | 2011 | Pcv2d | Domestic | Asia          |
| KM245558  | China      | 2014 | Pcv2d | Domestic | Asia          |
| JX535296  | USA        | 2012 | Pcv2d | Domestic | North America |
| HM776441  | China      | 2009 | Pcv2d | Domestic | Asia          |
| FJ870973  | China      | 2008 | Pcv2d | Domestic | Asia          |
| FJ870971  | China      | 2008 | Pcv2d | Domestic | Asia          |
| KF742551  | China      | 2012 | Pcv2d | Domestic | Asia          |
| FJ948168  | China      | 2008 | Pcv2d | Domestic | Asia          |
| KC753772  | China      | 2012 | Pcv2d | Domestic | Asia          |
| KC800646  | China      | 2011 | Pcv2d | Domestic | Asia          |
| KT216676  | Brazil     | 2012 | PCV2b | wildboar | South America |
| JN006452  | Romania    | 2008 | PCV2b | wildboar | Europe        |
| JN006454  | Romania    | 2008 | PCV2b | wildboar | Europe        |

Supplementary table 1

|          |            |      |       |          |               |
|----------|------------|------|-------|----------|---------------|
| JN006458 | Romania    | 2008 | PCV2b | wildboar | Europe        |
| JN382167 | Romania    | 2011 | PCV2b | wildboar | Europe        |
| JN006456 | Romania    | 2008 | PCV2b | wildboar | Europe        |
| JN006451 | Romania    | 2008 | PCV2b | wildboar | Europe        |
| JN006460 | Romania    | 2010 | PCV2b | wildboar | Europe        |
| KP768483 | Slovakia   | 2012 | PCV2b | wildboar | Europe        |
| KC620508 | SouthKorea | 2012 | PCV2d | wildboar | Asia          |
| KP768484 | Slovakia   | 2012 | PCV2b | wildboar | Europe        |
| JN382183 | Romania    | 2011 | PCV2d | wildboar | Europe        |
| KC620518 | SouthKorea | 2012 | PCV2b | wildboar | Asia          |
| JN382159 | Romania    | 2011 | PCV2b | wildboar | Europe        |
| JN006457 | Romania    | 2008 | PCV2b | wildboar | Europe        |
| KP768486 | Slovakia   | 2012 | PCV2b | wildboar | Europe        |
| JN382169 | Romania    | 2011 | PCV2b | wildboar | Europe        |
| JN006465 | Romania    | 2010 | PCV2a | wildboar | Europe        |
| JN382172 | Romania    | 2011 | PCV2b | wildboar | Europe        |
| JN382182 | Romania    | 2011 | PCV2b | wildboar | Europe        |
| KT216674 | Brazil     | 2012 | PCV2b | wildboar | South America |
| JN382158 | Romania    | 2011 | PCV2d | wildboar | Europe        |
| JN382161 | Romania    | 2011 | PCV2a | wildboar | Europe        |
| JN006447 | Romania    | 2009 | PCV2d | wildboar | Europe        |
| HQ591381 | Croatia    | 2009 | PCV2a | wildboar | Europe        |
| KC620520 | SouthKorea | 2011 | PCV2b | wildboar | Asia          |
| KT216672 | Brazil     | 2012 | PCV2b | wildboar | South America |
| KP768478 | Slovakia   | 2012 | PCV2b | wildboar | Europe        |
| JN006455 | Romania    | 2008 | PCV2b | wildboar | Europe        |
| JN382181 | Romania    | 2011 | PCV2b | wildboar | Europe        |
| KC620505 | SouthKorea | 2012 | PCV2b | wildboar | Asia          |
| KC620507 | SouthKorea | 2011 | PCV2b | wildboar | Asia          |
| JN382173 | Romania    | 2011 | PCV2b | wildboar | Europe        |
| KP768476 | Slovakia   | 2012 | PCV2b | wildboar | Europe        |
| JN006444 | Romania    | 2009 | PCV2d | wildboar | Europe        |
| JN382174 | Romania    | 2011 | PCV2b | wildboar | Europe        |
| KP768470 | Slovakia   | 2012 | PCV2b | wildboar | Europe        |
| KC620503 | SouthKorea | 2011 | PCV2b | wildboar | Asia          |
| JN382165 | Romania    | 2011 | PCV2b | wildboar | Europe        |
| JN382176 | Romania    | 2011 | PCV2b | wildboar | Europe        |
| KT216677 | Brazil     | 2012 | PCV2b | wildboar | South America |
| JN382184 | Romania    | 2011 | PCV2b | wildboar | Europe        |
| JN382177 | Romania    | 2011 | PCV2a | wildboar | Europe        |
| KC620510 | SouthKorea | 2011 | PCV2d | wildboar | Asia          |
| KC620511 | SouthKorea | 2010 | PCV2b | wildboar | Asia          |
| KC261600 | Brazil     | 2008 | PCV2b | wildboar | South America |
| JN382180 | Romania    | 2011 | PCV2b | wildboar | Europe        |
| JN382178 | Romania    | 2011 | PCV2a | wildboar | Europe        |
| JN382170 | Romania    | 2011 | PCV2d | wildboar | Europe        |
| KP768467 | Slovakia   | 2012 | PCV2a | wildboar | Europe        |
| KP768477 | Slovakia   | 2012 | PCV2b | wildboar | Europe        |
| KT216673 | Brazil     | 2012 | PCV2b | wildboar | South America |
| KP768480 | Slovakia   | 2012 | PCV2a | wildboar | Europe        |
| KC620512 | SouthKorea | 2012 | PCV2b | wildboar | Asia          |
| KP768468 | Slovakia   | 2012 | PCV2b | wildboar | Europe        |
| JN006448 | Romania    | 2010 | PCV2d | wildboar | Europe        |

Supplementary table 1

|          |            |      |       |          |               |
|----------|------------|------|-------|----------|---------------|
| JN382175 | Romania    | 2011 | PCV2b | wildboar | Europe        |
| KC620504 | SouthKorea | 2011 | PCV2d | wildboar | Asia          |
| KP768472 | Slovakia   | 2012 | PCV2b | wildboar | Europe        |
| JN382179 | Romania    | 2011 | PCV2d | wildboar | Europe        |
| KP768471 | Slovakia   | 2012 | PCV2b | wildboar | Europe        |
| KC620517 | SouthKorea | 2011 | PCV2b | wildboar | Asia          |
| JN006449 | Romania    | 2008 | PCV2d | wildboar | Europe        |
| JN006445 | Romania    | 2010 | PCV2d | wildboar | Europe        |
| KP768482 | Slovakia   | 2012 | PCV2b | wildboar | Europe        |
| KC620516 | SouthKorea | 2011 | PCV2b | wildboar | Asia          |
| KP768475 | Slovakia   | 2012 | PCV2a | wildboar | Europe        |
| JN382162 | Romania    | 2011 | PCV2a | wildboar | Europe        |
| JN006462 | Romania    | 2010 | PCV2b | wildboar | Europe        |
| KC620509 | SouthKorea | 2010 | PCV2b | wildboar | Asia          |
| JN006450 | Romania    | 2010 | PCV2d | wildboar | Europe        |
| JN006461 | Romania    | 2010 | PCV2b | wildboar | Europe        |
| JN382157 | Romania    | 2011 | PCV2a | wildboar | Europe        |
| KC620502 | SouthKorea | 2011 | PCV2b | wildboar | Asia          |
| JN382164 | Romania    | 2011 | PCV2b | wildboar | Europe        |
| JN006463 | Romania    | 2010 | PCV2b | wildboar | Europe        |
| JN382163 | Romania    | 2011 | PCV2d | wildboar | Europe        |
| KC620513 | SouthKorea | 2012 | PCV2b | wildboar | Asia          |
| KT216675 | Brazil     | 2012 | PCV2b | wildboar | South America |
| KP768473 | Slovakia   | 2012 | PCV2b | wildboar | Europe        |
| JN382168 | Romania    | 2011 | PCV2b | wildboar | Europe        |
| KP768481 | Slovakia   | 2012 | PCV2b | wildboar | Europe        |
| KC261601 | Brazil     | 2008 | PCV2b | wildboar | South America |
| KP768469 | Slovakia   | 2012 | PCV2b | wildboar | Europe        |
| KP768479 | Slovakia   | 2012 | PCV2b | wildboar | Europe        |
| KP768474 | Slovakia   | 2012 | PCV2a | wildboar | Europe        |
| KC620519 | SouthKorea | 2011 | PCV2b | wildboar | Asia          |
| JN382171 | Romania    | 2011 | PCV2b | wildboar | Europe        |
| JN382160 | Romania    | 2011 | PCV2a | wildboar | Europe        |
| JN006443 | Romania    | 2008 | PCV2d | wildboar | Europe        |
| JN006464 | Romania    | 2010 | PCV2b | wildboar | Europe        |
| KC620506 | SouthKorea | 2011 | PCV2b | wildboar | Asia          |
| JN006453 | Romania    | 2008 | PCV2b | wildboar | Europe        |
| JN006446 | Romania    | 2010 | PCV2d | wildboar | Europe        |
| KC620515 | SouthKorea | 2012 | PCV2b | wildboar | Asia          |
| KP768485 | Slovakia   | 2012 | PCV2b | wildboar | Europe        |
| KC620514 | SouthKorea | 2010 | PCV2b | wildboar | Asia          |
| JN382166 | Romania    | 2015 | PCV2b | wildboar | Europe        |
| JN006459 | Romania    | 2010 | PCV2b | wildboar | Europe        |
| KR559725 | Italy      | 2011 | PCV2b | wildboar | Europe        |
| KR559724 | Italy      | 2011 | PCV2d | wildboar | Europe        |
| KR559723 | Italy      | 2011 | PCV2b | wildboar | Europe        |
| KR559722 | Italy      | 2011 | PCV2b | wildboar | Europe        |
| KR559721 | Italy      | 2011 | PCV2b | wildboar | Europe        |
| KR559720 | Italy      | 2011 | PCV2b | wildboar | Europe        |
| KR559719 | Italy      | 2011 | PCV2b | wildboar | Europe        |
| KR559718 | Italy      | 2011 | PCV2b | wildboar | Europe        |
| KR559717 | Italy      | 2011 | PCV2b | wildboar | Europe        |
| KR559716 | Italy      | 2011 | PCV2b | wildboar | Europe        |

Supplementary table 1

|          |       |      |       |          |        |
|----------|-------|------|-------|----------|--------|
| KR559715 | Italy | 2011 | PCV2b | wildboar | Europe |
| KR559714 | Italy | 2011 | PCV2b | wildboar | Europe |
| KR559713 | Italy | 2011 | PCV2b | wildboar | Europe |
| KR559712 | Italy | 2011 | PCV2d | wildboar | Europe |
| KR559711 | Italy | 2011 | PCV2d | wildboar | Europe |
| KR559710 | Italy | 2011 | PCV2b | wildboar | Europe |
| KR559709 | Italy | 2011 | PCV2d | wildboar | Europe |
| KR559708 | Italy | 2011 | PCV2b | wildboar | Europe |
| KR559707 | Italy | 2011 | PCV2b | wildboar | Europe |
| KR559706 | Italy | 2012 | PCV2b | wildboar | Europe |
| KR559705 | Italy | 2010 | PCV2b | wildboar | Europe |
| KR559704 | Italy | 2010 | PCV2b | wildboar | Europe |
| KR559703 | Italy | 2010 | PCV2b | wildboar | Europe |
| KR559702 | Italy | 2010 | PCV2b | wildboar | Europe |
| KR559701 | Italy | 2011 | PCV2b | wildboar | Europe |
| KR559700 | Italy | 2009 | PCV2b | wildboar | Europe |
| KR559699 | Italy | 2009 | PCV2b | wildboar | Europe |
| KR559698 | Italy | 2009 | PCV2b | wildboar | Europe |
