# Supplementary material for: Porcine circovirus type 2 (PCV2) evolution before and after the vaccination introduction: A large scale epidemiological study
Source: PubMed Central journal article supplement (PMC5171922; doi:10.1038/srep39458), 2016-12-19
Supplement: srep39458-s4.pdf [file srep39458-s4.pdf]

**Porcine circovirus type 2 (PCV2) evolution before and after the vaccination introduction. A large scale epidemiological study.**

Giovanni Franzo<sup>\*#1</sup>, Claudia Maria Tucciarone<sup>#1</sup>, Mattia Cecchinato<sup>1</sup> and Michele Drigo<sup>1</sup>.

<sup>1</sup>University of Padua, Legnaro (PD), Italy;

|                      | <b>Pcv2a</b>    |                  | <b>Total</b> |
|----------------------|-----------------|------------------|--------------|
| <b>Area</b>          | Pre-Vaccination | Post-Vaccination |              |
| <b>Africa</b>        | 1               |                  | <b>1</b>     |
| <b>Asia</b>          | 33              | 48               | <b>81</b>    |
| <b>Europe</b>        | 26              | 14               | <b>40</b>    |
| <b>North America</b> | 46              | 78               | <b>124</b>   |
| <b>Oceania</b>       | 7               |                  | <b>7</b>     |
| <b>South America</b> |                 | 5                | <b>5</b>     |
| <b>Total</b>         | <b>113</b>      | <b>145</b>       | <b>258</b>   |

  

|                      | <b>Pcv2b</b>    |                  | <b>Total</b> |
|----------------------|-----------------|------------------|--------------|
| <b>Area</b>          | Pre-Vaccination | Post-Vaccination |              |
| <b>Asia</b>          | 50              | 36               | <b>86</b>    |
| <b>Europe</b>        | 77              | 44               | <b>121</b>   |
| <b>North America</b> | 22              | 3                | <b>25</b>    |
| <b>Oceania</b>       |                 | 1                | <b>1</b>     |
| <b>South America</b> | 14              |                  | <b>14</b>    |
| <b>Total</b>         | <b>163</b>      | <b>84</b>        | <b>247</b>   |

  

|                      | <b>PCV2a-PCV2b-PCV2d</b> |            |              |
|----------------------|--------------------------|------------|--------------|
| <b>Area</b>          | Wildboar                 | Domestic   | <b>Total</b> |
| <b>Asia</b>          | 19                       | 75         | <b>94</b>    |
| <b>Europe</b>        | 100                      | 45         | <b>145</b>   |
| <b>North America</b> |                          | 4          | <b>4</b>     |
| <b>Oceania</b>       |                          | 1          | <b>1</b>     |
| <b>South America</b> | 8                        | 2          | <b>10</b>    |
| <b>Total</b>         | <b>127</b>               | <b>127</b> | <b>254</b>   |

Supplementary table 2. Count of strain geographic origin grouped in database 1-2 (i.e. PCV2a before and after vaccination introduction) (a), 3-4 (i.e. PCV2b before and after vaccination introduction) (b) and 5-6 (PCV2 strains detected in domestic pigs and wild boars)
